# Supplementary material
Source: Springer Nature journal article supplement (http://www.springermedizin.de/resource/supplementary/12933_2010_285_MOESM4_ESM.pdf/9540024)

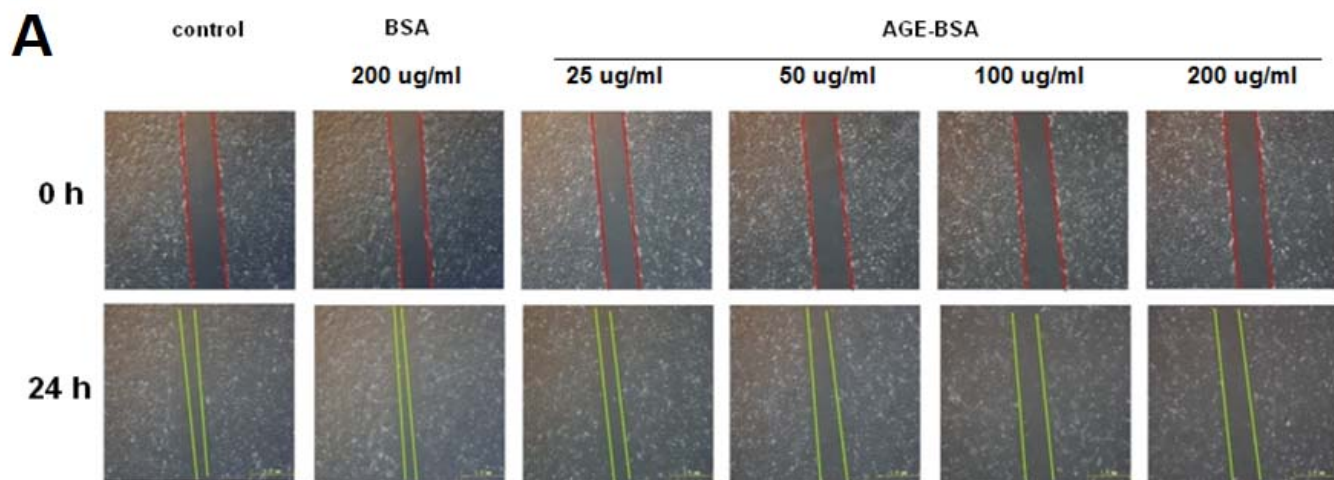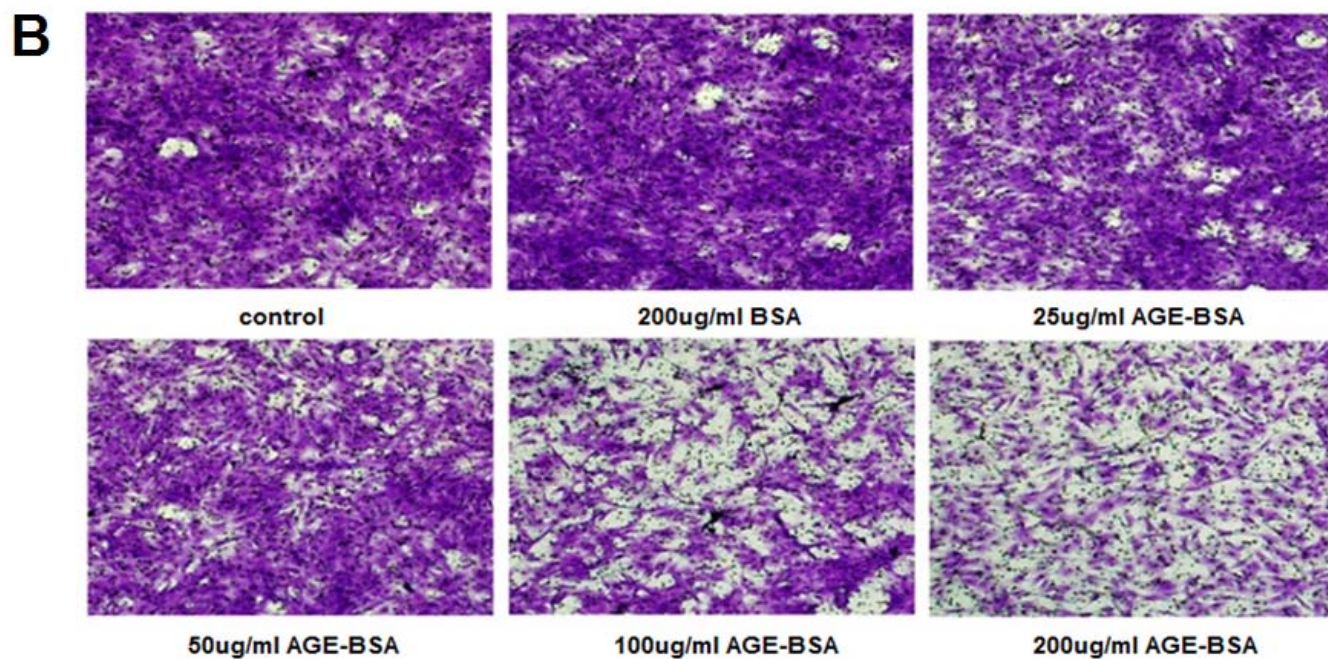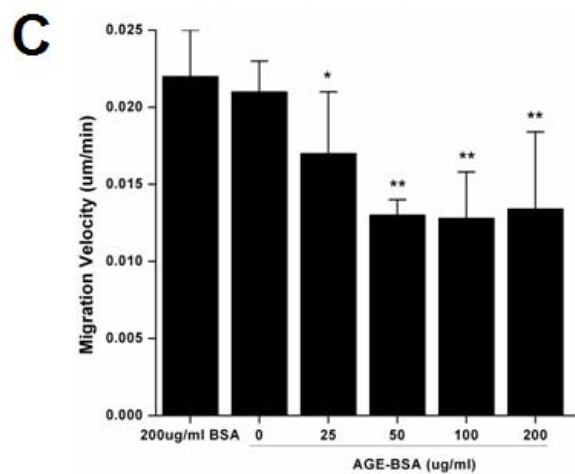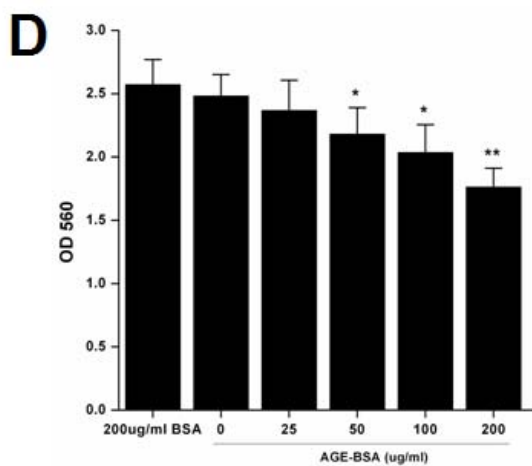

Supplement: MOESM4 [file 9540024]
